# Supplementary material for: Comprehensive Qualitative Ingredient Profiling of Chinese Herbal Formula Wu-Zhu-Yu Decoction via a Mass Defect and Fragment Filtering Approach Using High Resolution Mass Spectrometry
Source: PubMed Central journal article supplement (PMC6273025; doi:10.3390/molecules21050664), 2016-05-19
Supplement: molecules-21-00664-s001.pdf [file molecules-21-00664-s001.pdf]

# Supplementary Materials: Comprehensive Ingredients Qualitative Profiling of Chinese Herbal Formula Wu-Zhu-Yu Decoction Based on Mass Defect and Fragment Filtering Approach Using High Resolution Mass Spectrometry

Huarong Xu, Huibin Niu, Bosai He, Chang Cui, Qing Li and Kaishun Bi

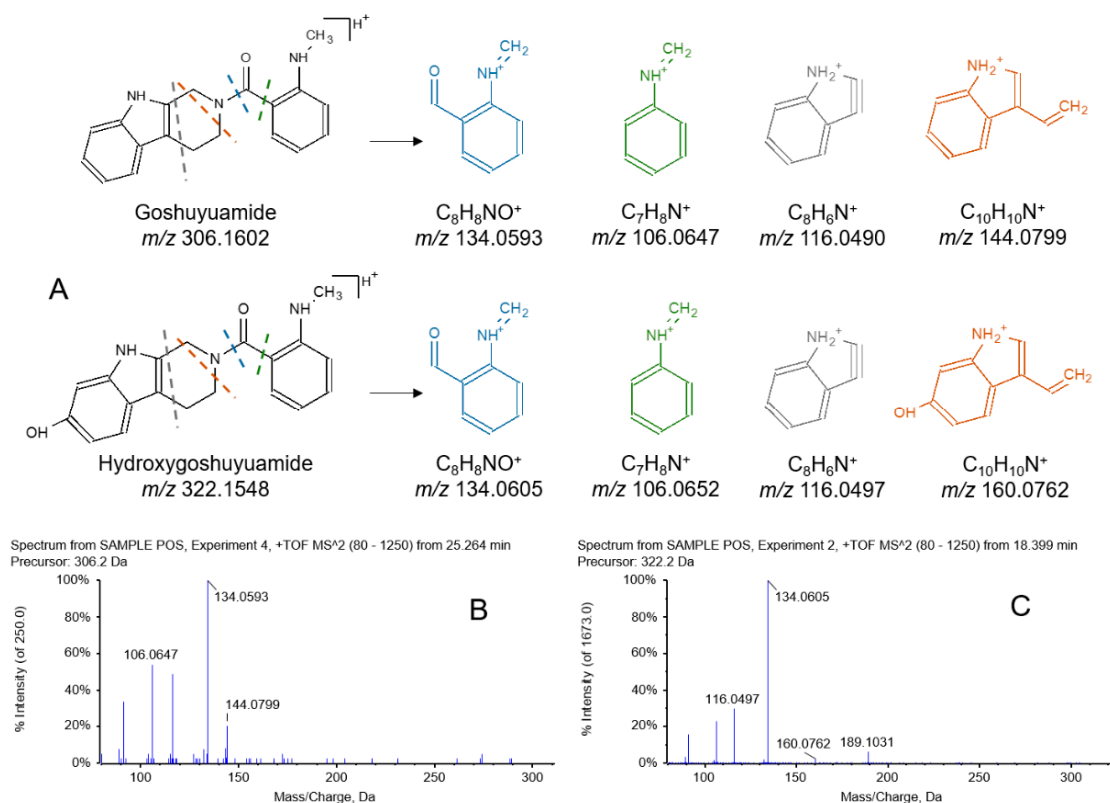

**Figure S1.** Fragmentation pattern of goshuyuamide and hydroxygoshuyuamide. **(A)** Representative fragments of goshuyuamide and hydroxygoshuyuamide; **(B)** product ion MS/MS spectrum of goshuyuamide; **(C)** product ion MS/MS spectrum of hydroxygoshuyuamide.

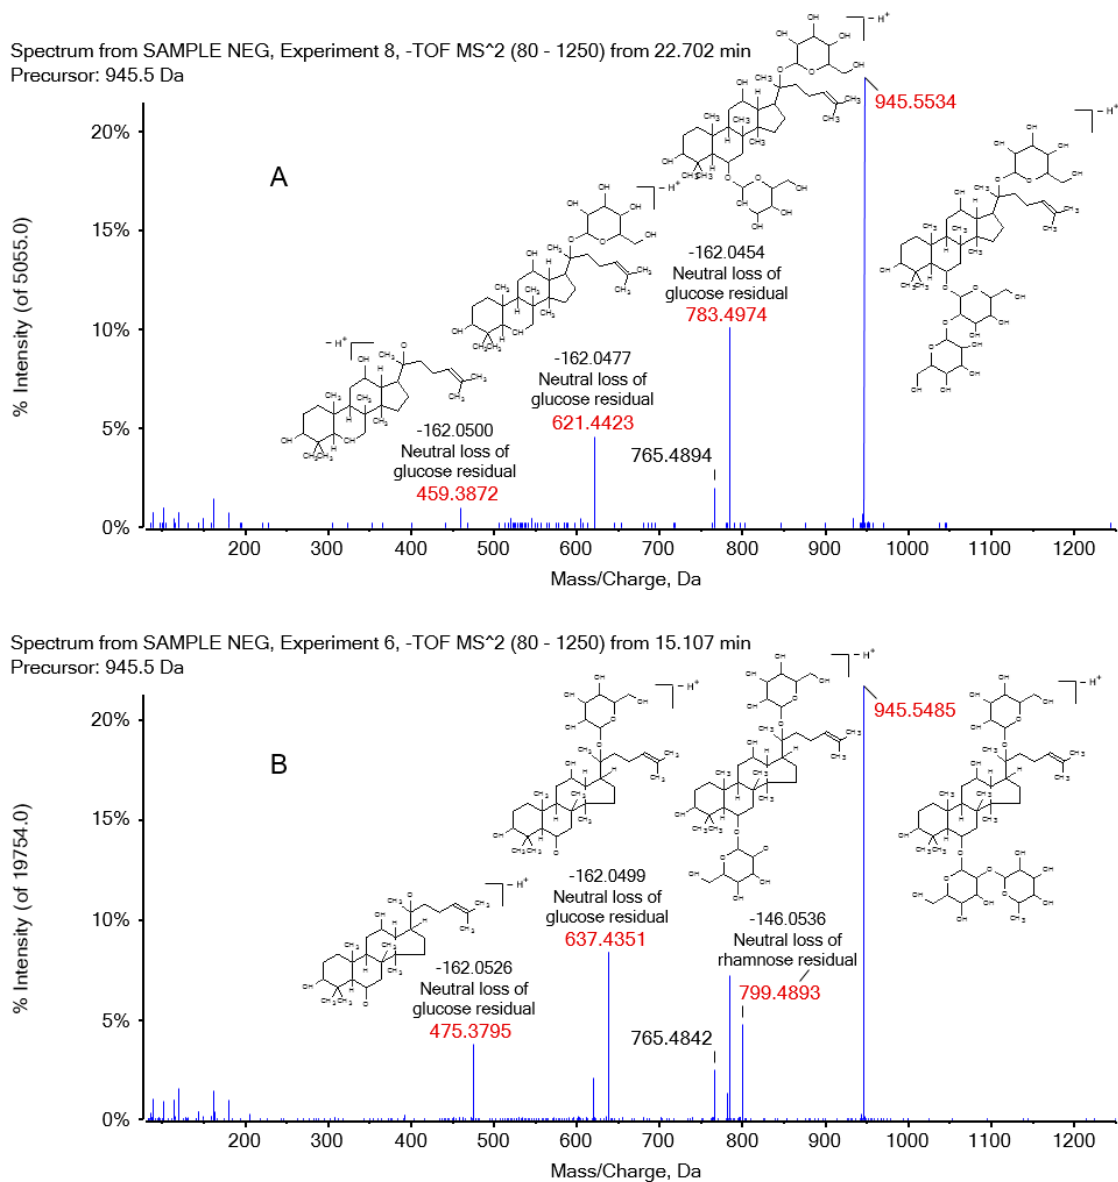

**Figure S2.** (A) Fragmentation pathways and product ion MS/MS spectrums of (A) PPD type ginsenoside Rd and (B) PPT type ginsenoside Re.

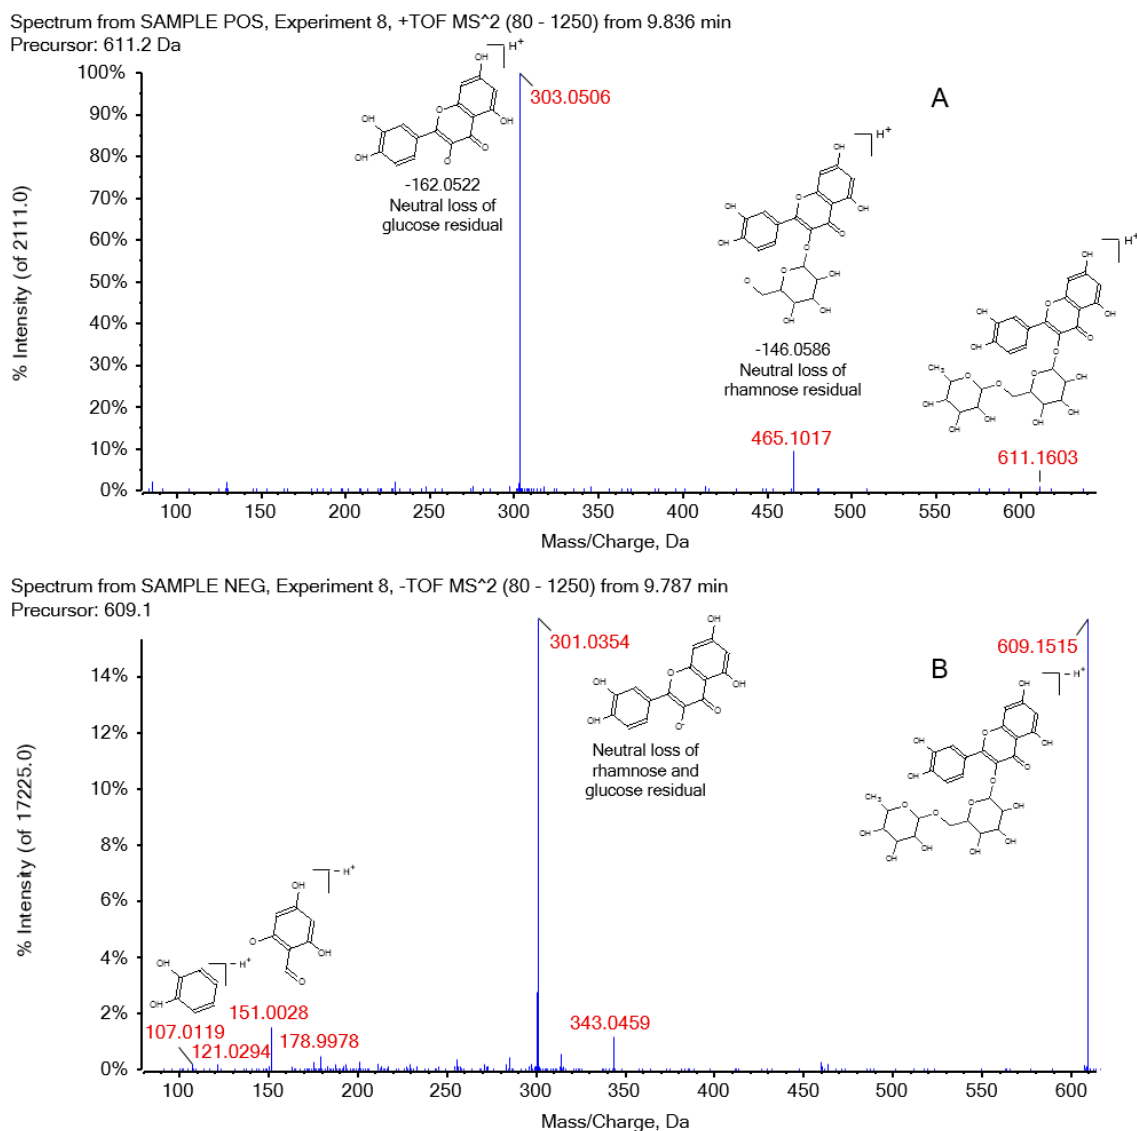

**Figure S3.** Fragmentation pathways and product ion MS/MS spectrums of rutin in (A) positive and (B) negative ion mode.

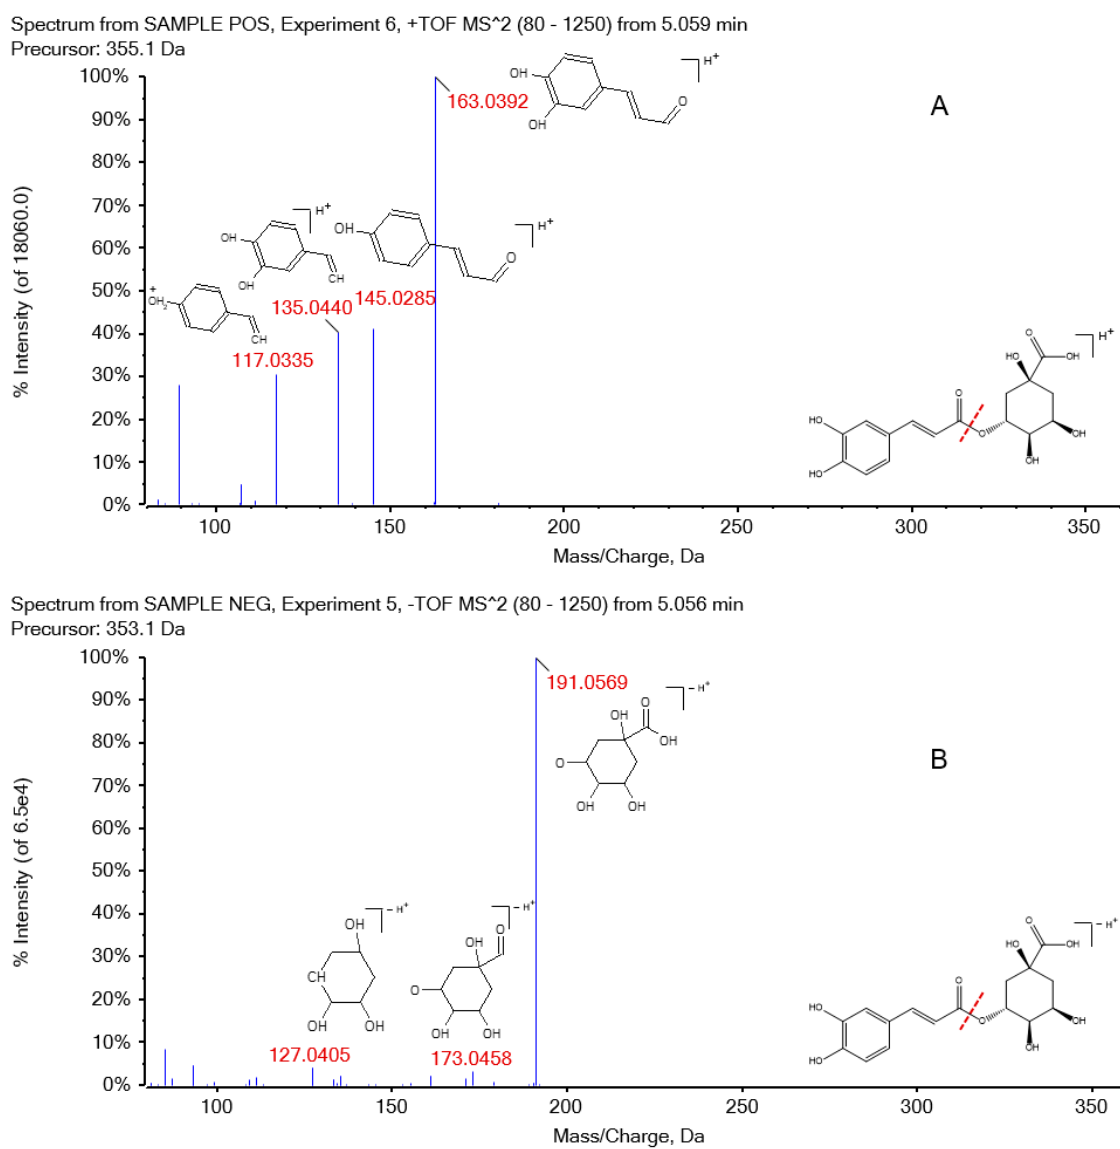

**Figure S4.** Fragmentation pathways and product ion MS/MS spectrums of chlorogenic acid in (A) positive and (B) negative ion mode.

**Table S1.** Characterization of the ingredients in Wu-Zhu-Yu decoction by LC high resolution MS.

| No.                                           | Compound                     | Formula                                                       | Ion Adduction        | Theoretical <i>m/z</i> (Da) | Measured <i>m/z</i> (Da) | Error/ppm | tr/min | Product Ions ( <i>m/z</i> , Da)                                                                                                                                                              |
|-----------------------------------------------|------------------------------|---------------------------------------------------------------|----------------------|-----------------------------|--------------------------|-----------|--------|----------------------------------------------------------------------------------------------------------------------------------------------------------------------------------------------|
| <b>Evodiamine and its analogous alkaloids</b> |                              |                                                               |                      |                             |                          |           |        |                                                                                                                                                                                              |
| 1                                             | Dihydroxyevodiamine          | C <sub>19</sub> H <sub>17</sub> N <sub>3</sub> O <sub>3</sub> | [M + H] <sup>+</sup> | 336.13427                   | 336.13458                | 0.9       | 7.57   | 134.0599, 161.0711, 176.0707, 148.0394, 146.0597, 120.0446, 160.0636, 106.0648, 162.0541, 130.0288                                                                                           |
| 2                                             | Hydroevoprenine              | C <sub>20</sub> H <sub>23</sub> NO <sub>4</sub>               | [M + H] <sup>+</sup> | 342.16998                   | 342.17001                | 0.1       | 7.85   | 282.0885, 222.0674, 235.0752, 311.1265, 310.1427, 207.0804, 236.0832, 252.0779, 256.1072, 270.0882, 242.0948, 292.1337, 308.1300                                                             |
| 3                                             | Evoprenine                   | C <sub>20</sub> H <sub>21</sub> NO <sub>4</sub>               | [M + H] <sup>+</sup> | 340.15433                   | 340.15384                | -1.5      | 8.16   | 220.0520, 189.0699, 217.0636, 308.1249, 276.1055, 196.0963, 295.0963, 189.0820, 266.1210, 282.1120, 290.1170, 310.1183324.1239                                                               |
| 4                                             | Methyl-Dihydroevoprenine     | C <sub>21</sub> H <sub>27</sub> NO <sub>4</sub>               | [M + H] <sup>+</sup> | 358.20129                   | 358.20147                | 0.5       | 9.32   | 160.0757, 282.1254, 298.1201, 312.1594, 253.1221, 221.0967, 286.1197, 107.0491, 329.1747, 300.1353, 223.1118, 136.0515, 252.1141, 240.1019, 268.1104, 326.1748                               |
| 5                                             | Hydroxyevodiamine            | C <sub>19</sub> H <sub>17</sub> N <sub>3</sub> O <sub>2</sub> | [M + H] <sup>+</sup> | 320.13935                   | 320.13908                | -0.9      | 9.35   | 134.0584, 161.0703, 160.0759, 91.0553                                                                                                                                                        |
| 6                                             | Methyl-Hydroevoprenine       | C <sub>21</sub> H <sub>25</sub> NO <sub>4</sub>               | [M + H] <sup>+</sup> | 356.18564                   | 356.18563                | 0.0       | 10.08  | 236.0841, 249.0911, 221.0968, 298.1202, 282.1272, 266.0932, 252.0785, 310.1188                                                                                                               |
| 7                                             | Dihydroxyrutaecarpine        | C <sub>18</sub> H <sub>13</sub> N <sub>3</sub> O <sub>3</sub> | [M + H] <sup>+</sup> | 320.10297                   | 320.10276                | -0.6      | 11.14  | 169.0403, 302.0925, 134.0603, 114.0337, 274.1102, 128.0471, 159.0540, 247.0883, 104.0481, 156.0448, 169.0233, 276.1154,                                                                      |
| 8                                             | Methyl-Hydroxyevodiamine     | C <sub>20</sub> H <sub>19</sub> N <sub>3</sub> O <sub>2</sub> | [M + H] <sup>+</sup> | 334.15500                   | 334.15494                | -0.2      | 12.21  | 134.0592, 161.0711, 174.0915, 130.0648, 91.0540,                                                                                                                                             |
| 9                                             | Dehydroevodiamine            | C <sub>19</sub> H <sub>15</sub> N <sub>3</sub> O              | [M + H] <sup>+</sup> | 302.12879                   | 302.12855                | -0.8      | 12.44  | 286.0975, 258.1026, 272.0824, 167.0608, 259.0870, 134.0595, 132.0445, 106.0651, 231.0916                                                                                                     |
| 10                                            | Methyl-hydroxyrutaecarpine   | C <sub>19</sub> H <sub>15</sub> N <sub>3</sub> O <sub>2</sub> | [M + H] <sup>+</sup> | 318.12370                   | 318.12374                | 0.1       | 12.68  | 285.0898, 256.0875, 300.1134, 284.0824, 274.1337, 230.0847                                                                                                                                   |
| 11                                            | Methyl-dihydroxyrutaecarpine | C <sub>19</sub> H <sub>17</sub> N <sub>3</sub> O              | [M + H] <sup>+</sup> | 304.14444                   | 304.14409                | -1.1      | 12.88  | 144.0807, 161.0708, 120.0439, 92.0487, 128.0490, 134.0592, 116.0499, 142.0647, 118.0645, 145.0389                                                                                            |
| 12                                            | Ethyl-hydroxyrutaecarpine    | C <sub>20</sub> H <sub>17</sub> N <sub>3</sub> O <sub>2</sub> | [M + H] <sup>+</sup> | 332.13935                   | 332.13902                | -1.0      | 13.34  | 302.0915, 274.0967, 316.1072, 317.1147, 289.1200, 288.1124, 272.0816, 247.0863, 197.0706, 300.1129, 262.0958, 258.0779, 130.0649, 245.0715, 233.0711, 116.0484, 186.0903, 230.0833, 237.1015 |
| 13                                            | Evodianinine                 | C <sub>19</sub> H <sub>13</sub> N <sub>3</sub> O              | [M + H] <sup>+</sup> | 300.11314                   | 300.11323                | 0.3       | 13.66  | 285.0896, 257.0950, 256.0873, 300.1137, 229.0763, 284.0822, 231.0797, 155.0609, 167.0609, 270.1031, 128.0502                                                                                 |
| 14                                            | Wuchuyamide I                | C <sub>19</sub> H <sub>17</sub> N <sub>3</sub> O <sub>4</sub> | [M + H] <sup>+</sup> | 352.12918                   | 352.12889                | -0.8      | 14.18  | 189.0656, 103.0537, 159.0544, 177.0661, 104.0486, 132.0446, 120.0442                                                                                                                         |
| 15                                            | Evolitrine                   | C <sub>13</sub> H <sub>11</sub> NO <sub>3</sub>               | [M + H] <sup>+</sup> | 230.08117                   | 230.08125                | 0.3       | 17.39  | 200.0354, 186.0546, 214.0503, 172.0396                                                                                                                                                       |
| 16                                            | Hydroxygoshuyamide           | C <sub>19</sub> H <sub>19</sub> N <sub>3</sub> O <sub>2</sub> | [M + H] <sup>+</sup> | 322.15500                   | 322.15475                | -0.8      | 18.40  | 134.0593, 106.0647, 116.0490, 160.0762, 189.1031                                                                                                                                             |
| 17                                            | Hydroxyrutaecarpine          | C <sub>18</sub> H <sub>13</sub> N <sub>3</sub> O <sub>2</sub> | [M + H] <sup>+</sup> | 304.10805                   | 304.10823                | 0.6       | 19.34  | 286.0979, 258.1032, 140.0494, 274.0962, 259.0883, 120.0446, 128.0510, 147.0581, 183.0581, 228.0702                                                                                           |
| 18                                            | Evodiamide                   | C <sub>19</sub> H <sub>21</sub> N <sub>3</sub> O              | [M + H] <sup>+</sup> | 308.17574                   | 308.17576                | 0.1       | 22.47  | 134.0598, 116.0495, 106.0649, 144.0805, 132.0441, 105.0338                                                                                                                                   |

Table S1. Cont.

| No.              | Compound                     | Formula                                          | Ion Adduction        | Theoretical <i>m/z</i> (Da) | Measured <i>m/z</i> (Da) | Error/ppm | tr/min | Product Ions ( <i>m/z</i> , Da)                                                                                                                                           |
|------------------|------------------------------|--------------------------------------------------|----------------------|-----------------------------|--------------------------|-----------|--------|---------------------------------------------------------------------------------------------------------------------------------------------------------------------------|
| 19               | Evodiamine                   | C <sub>19</sub> H <sub>17</sub> N <sub>3</sub> O | [M + H] <sup>+</sup> | 304.14444                   | 304.14454                | 0.3       | 22.75  | 134.0602, 161.0710, 171.0918, 144.0808, 116.0494, 106.0651                                                                                                                |
| 20               | Rutaecarpine                 | C <sub>18</sub> H <sub>13</sub> N <sub>3</sub> O | [M + H] <sup>+</sup> | 288.11314                   | 288.11340                | 0.9       | 23.59  | 273.0903, 169.0767, 243.0922, 272.0820, 167.0607, 145.0404, 120.0447, 219.0925, 116.0496, 144.0816, 231.0931, 143.0605, 92.0499,                                          |
| 21               | Goshuyamide                  | C <sub>19</sub> H <sub>19</sub> N <sub>3</sub> O | [M + H] <sup>+</sup> | 306.16009                   | 306.16017                | 0.3       | 25.27  | 134.0593, 106.0647, 116.0490, 144.0799, 132.0451                                                                                                                          |
| 22               | Evocarpine                   | C <sub>23</sub> H <sub>33</sub> NO               | [M + H] <sup>+</sup> | 340.26349                   | 340.26324                | -0.7      | 31.89  | 186.0914, 200.1061, 158.0602, 242.1531, 172.0762, 228.1386, 256.1693, 214.1218, 198.1272, 132.0563, 160.0739, 296.1997, 144.0445, 167.0739, 270.1841, 312.2319            |
| 23               | Dihydroevocarpine            | C <sub>23</sub> H <sub>35</sub> NO               | [M + H] <sup>+</sup> | 342.27914                   | 342.27856                | -1.7      | 32.61  | 186.0920, 200.1069, 132.0565, 158.0611, 144.0802, 172.0769, 228.1417, 160.0751, 284.1982, 104.0619, 214.1289, 242.1540, 256.1695                                          |
| <b>Limonoids</b> |                              |                                                  |                      |                             |                          |           |        |                                                                                                                                                                           |
| 24               | Evodinone                    | C <sub>26</sub> H <sub>30</sub> O <sub>9</sub>   | [M + H] <sup>+</sup> | 487.19626                   | 487.19640                | 0.3       | 8.09   | 441.1930, 469.1856, 197.0974, 95.0131, 227.1060, 321.1474, 81.0331, 259.0973, 205.0526, 219.0618, 401.1558, 289.1198, 279.1374, 209.0956, 163.1426, 265.1224, 261.1272    |
| 25               | Rutaevine                    | C <sub>26</sub> H <sub>30</sub> O <sub>9</sub>   | [M + H] <sup>+</sup> | 487.19626                   | 487.19598                | -0.6      | 12.16  | 121.0280, 95.0126, 197.0964, 179.0857, 193.1002, 221.0968, 209.0951, 105.0697, 135.0801, 167.0845                                                                         |
|                  |                              |                                                  | [M - H] <sup>-</sup> | 485.18171                   | 485.18297                | 2.6       | 12.14  | 345.1705, 129.0555, 273.1126, 261.1124, 95.0138, 227.1069, 111.0448                                                                                                       |
| 26               | Rutaevine Acetate            | C <sub>28</sub> H <sub>32</sub> O <sub>10</sub>  | [M + H] <sup>+</sup> | 529.20682                   | 529.20619                | -1.2      | 13.21  | 451.1752, 393.1335, 175.0761, 425.1952, 105.0706, 95.0134, 205.0505, 349.1436, 133.0653, 321.1489, 277.1232, 365.1746, 261.1275, 441.1903, 121.0653, 469.1846, 289.1227   |
| 27               | 12 $\alpha$ -Hydroxyevodol   | C <sub>26</sub> H <sub>28</sub> O <sub>10</sub>  | [M + H] <sup>+</sup> | 501.17552                   | 501.17475                | -1.6      | 17.44  | 443.2064, 95.0121, 211.1117, 329.1496, 425.1923, 105.0696, 209.0960, 307.1692, 427.2089, 383.1832, 133.0638, 279.1358, 429.1895, 411.1787, 331.1676                       |
|                  |                              |                                                  | [M - H] <sup>-</sup> | 499.16097                   | 499.16131                | 0.7       | 17.42  | 437.16118, 439.1432, 411.1450, 135.0442, 123.0454, 149.0602, 163.0407, 209.0957, 239.1066, 347.1664, 171.0828, 197.0973, 211.0748, 251.1045, 263.0925, 277.1254, 349.1398 |
| 28               | Limonoid acid A-ring lactone | C <sub>26</sub> H <sub>32</sub> O <sub>9</sub>   | [M + H] <sup>+</sup> | 489.21191                   | 489.21149                | -0.9      | 17.85  | 443.2064, 277.1226, 211.1117, 425.1923, 223.1093, 305.1519, 251.1049, 169.1004, 183.0795, 213.0904, 237.0900, 241.1227                                                    |
|                  |                              |                                                  | [M - H] <sup>-</sup> | 487.19736                   | 487.19890                | 3.2       | 17.84  | 337.1446, 457.1877, 293.1176, 413.1967, 295.1334, 241.1221, 309.1485, 351.1956, 355.1565, 385.2005, 213.1271, 317.1750, 395.1887, 133.0658, 159.0802, 197.0957            |
| 29               | Gaucin A                     | C <sub>26</sub> H <sub>30</sub> O <sub>10</sub>  | [M + H] <sup>+</sup> | 503.19117                   | 503.19055                | -1.2      | 17.98  | 105.0700, 365.1400, 395.1464, 95.0134, 323.1277, 205.0503, 265.1206, 277.1232, 353.1756, 503.1917, 137.0601, 151.0750, 209.0814, 221.0807                                 |
|                  |                              |                                                  | [M - H] <sup>-</sup> | 501.17662                   | 501.17786                | 2.5       | 17.96  | 411.1460, 409.1668, 471.1683, 427.1774, 393.1347                                                                                                                          |
| 30               | Obacunone                    | C <sub>26</sub> H <sub>30</sub> O <sub>7</sub>   | [M + H] <sup>+</sup> | 455.20643                   | 455.20594                | -1.1      | 18.25  | 235.1099, 171.0831, 195.1191, 207.1154, 247.0953                                                                                                                          |

Table S1. Cont.

| No.              | Compound                         | Formula                                         | Ion Adduction        | Theoretical <i>m/z</i> (Da) | Measured <i>m/z</i> (Da) | Error/ppm | tr/min | Product Ions ( <i>m/z</i> , Da)                                                                                                                                                                                                               |
|------------------|----------------------------------|-------------------------------------------------|----------------------|-----------------------------|--------------------------|-----------|--------|-----------------------------------------------------------------------------------------------------------------------------------------------------------------------------------------------------------------------------------------------|
| 31               | 12 $\alpha$ -Hydroxylimonin      | C <sub>26</sub> H <sub>30</sub> O <sub>9</sub>  | [M + H] <sup>+</sup> | 487.19626                   | 487.19590                | -0.7      | 18.72  | 441.1903, 469.1856, 105.0698, 443.2077, 277.1217, 383.1476, 197.0974, 365.1376                                                                                                                                                                |
|                  |                                  |                                                 | [M - H] <sup>-</sup> | 485.18171                   | 485.18330                | 3.3       | 18.69  | 123.0457, 485.1845, 425.1622, 423.1828, 347.1296, 379.1563, 307.1339, 405.1720, 241.1235, 211.1131, 251.1083, 223.1131, 105.0347, 111.0453                                                                                                    |
| 32               | Limonin                          | C <sub>26</sub> H <sub>30</sub> O <sub>8</sub>  | [M + H] <sup>+</sup> | 471.20134                   | 471.20104                | -0.6      | 20.01  | 425.1942, 213.0913, 95.0136, 105.0703, 367.1890, 133.0653, 453.1889, 205.0495, 411.1803                                                                                                                                                       |
|                  |                                  |                                                 | [M - H] <sup>-</sup> | 469.18679                   | 469.18729                | 1.1       | 19.96  | 381.2103, 223.1128, 451.1834, 135.0819, 107.0529, 249.1274, 395.1884, 197.0989, 209.0991, 259.1006, 263.1448, 321.1486                                                                                                                        |
| 33               | Evodol                           | C <sub>26</sub> H <sub>28</sub> O <sub>9</sub>  | [M + H] <sup>+</sup> | 485.18061                   | 485.18080                | 0.4       | 21.05  | 381.1705, 439.1774, 105.0699, 133.0650, 425.1600, 137.0942, 363.1599                                                                                                                                                                          |
|                  |                                  |                                                 | [M - H] <sup>-</sup> | 483.16606                   | 483.16698                | 1.9       | 20.96  | 421.1679, 423.1467, 395.1513, 135.0451, 259.0979, 377.1400, 163.0402, 403.1562, 375.1612, 333.1495, 349.1445, 263.1437                                                                                                                        |
| 34               | Jangomolide                      | C <sub>26</sub> H <sub>28</sub> O <sub>8</sub>  | [M + H] <sup>+</sup> | 469.18569                   | 469.18512                | -1.2      | 21.90  | 95.0124, 221.0952, 165.0701, 195.0815, 219.0805, 133.0645, 169.0661, 179.0865, 289.1233, 423.1824, 125.0599, 195.1191, 211.0769, 233.0943, 249.1121, 117.0709, 135.0807, 107.0483, 149.0595, 205.0517, 209.0834, 231.0632, 243.0782, 451.1743 |
|                  |                                  |                                                 | [M - H] <sup>-</sup> | 467.17114                   | 467.17260                | 3.1       | 21.80  | 423.1834, 365.1422, 207.0649, 349.1106, 249.1300, 135.0800, 147.0427, 193.1015, 221.0968, 263.1436, 83.0495, 111.0438, 121.0264, 133.0679, 217.0472, 223.1079, 259.0983, 421.16332                                                            |
| 35               | 6 $\alpha$ -acetoxy-5-epilimonin | C <sub>28</sub> H <sub>32</sub> O <sub>10</sub> | [M + H] <sup>+</sup> | 529.20682                   | 529.20667                | -0.3      | 22.69  | 393.1341, 205.0496, 349.1441, 365.1730, 95.0126, 117.0677, 173.0956, 4233.1795                                                                                                                                                                |
|                  |                                  |                                                 | [M - H] <sup>-</sup> | 527.19227                   | 527.19415                | 3.6       | 22.58  | 485.1845, 339.1612, 441.1937, 409.1297, 305.1042, 259.0987, 149.0608, 267.1396, 439.1780                                                                                                                                                      |
| <b>Gingerols</b> |                                  |                                                 |                      |                             |                          |           |        |                                                                                                                                                                                                                                               |
| 36               | 4-Gingerol                       | C <sub>15</sub> H <sub>22</sub> O <sub>4</sub>  | [M + H] <sup>+</sup> | 267.15909                   | 267.15935                | 1.0       | 16.30  | -                                                                                                                                                                                                                                             |
|                  |                                  |                                                 | [M - H] <sup>-</sup> | 265.14453                   | 265.14449                | -0.2      | 16.32  | -                                                                                                                                                                                                                                             |
| 37               | Gingerenone A                    | C <sub>21</sub> H <sub>24</sub> O <sub>5</sub>  | [M + H] <sup>+</sup> | 357.16965                   | 357.16932                | -0.9      | 16.36  | -                                                                                                                                                                                                                                             |
| 38               | Hexahydrocurcumin                | C <sub>21</sub> H <sub>26</sub> O <sub>6</sub>  | [M + H] <sup>+</sup> | 375.18022                   | 375.17990                | -0.9      | 16.36  | 137.0602, 103.0548, 177.0912, 115.0570, 163.0756, 179.0707, 165.0982                                                                                                                                                                          |
|                  |                                  |                                                 | [M - H] <sup>-</sup> | 373.16566                   | 373.16598                | 0.8       | 16.36  | 179.0709, 121.0287, 135.0451, 163.0402, 193.0889                                                                                                                                                                                              |
| 39               | 6-Gingediacetate                 | C <sub>21</sub> H <sub>32</sub> O <sub>6</sub>  | [M + H] <sup>+</sup> | 381.22717                   | 381.22741                | 0.6       | 17.51  | -                                                                                                                                                                                                                                             |
| 40               | 7-Paradol                        | C <sub>18</sub> H <sub>28</sub> O <sub>3</sub>  | [M + H] <sup>+</sup> | 293.21112                   | 293.21078                | -1.2      | 18.08  | 91.0551, 131.0851                                                                                                                                                                                                                             |
| 41               | Methyl-6-Shogaol                 | C <sub>18</sub> H <sub>26</sub> O <sub>3</sub>  | [M + H] <sup>+</sup> | 291.19547                   | 291.19554                | 0.2       | 21.89  | 93.0692, 107.0510, 115.0545, 135.0772                                                                                                                                                                                                         |
|                  |                                  |                                                 | [M - H] <sup>-</sup> | 289.18092                   | 289.18082                | -0.3      | 21.80  | -                                                                                                                                                                                                                                             |
| 42               | 7-Gingerol                       | C <sub>18</sub> H <sub>28</sub> O <sub>4</sub>  | [M + H] <sup>+</sup> | 309.20604                   | 309.20576                | -0.9      | 21.89  | 91.0542, 105.0705, 107.0490, 95.0861, 97.1019, 145.0999, 121.0645, 125.0949, 131.0857, 135.0871                                                                                                                                               |
|                  |                                  |                                                 | [M - H] <sup>-</sup> | 307.19148                   | 307.19167                | 0.6       | 21.79  | 121.0662, 125.0994, 184.1241, 235.1337, 97.0646, 137.0939, 211.1326                                                                                                                                                                           |

Table S1. Cont.

| No.                 | Compound               | Formula                                         | Ion Adduction              | Theoretical <i>m/z</i> (Da) | Measured <i>m/z</i> (Da) | Error/ppm | tr/min | Product Ions ( <i>m/z</i> , Da)                                                                    |
|---------------------|------------------------|-------------------------------------------------|----------------------------|-----------------------------|--------------------------|-----------|--------|----------------------------------------------------------------------------------------------------|
| 43                  | 6-Gingerol             | C <sub>17</sub> H <sub>26</sub> O <sub>4</sub>  | [M + H] <sup>+</sup>       | 295.19039                   | 295.19063                | 0.8       | 22.36  | 137.0694, 91.0537, 145.0652, 177.0921, 179.0716,                                                   |
|                     |                        |                                                 | [M - H] <sup>-</sup>       | 293.17583                   | 293.17589                | 0.2       | 22.28  | 99.0816, 135.0461, 177.0585                                                                        |
| 44                  | 6-Shogaol              | C <sub>17</sub> H <sub>24</sub> O <sub>3</sub>  | [M + H] <sup>+</sup>       | 277.17982                   | 277.17999                | 0.6       | 22.36  | 137.0595, 177.0906, 91.0537, 161.0594, 175.0767                                                    |
| 45                  | Dehydro-6-Gingerol     | C <sub>17</sub> H <sub>24</sub> O <sub>4</sub>  | [M + H] <sup>+</sup>       | 293.17474                   | 293.17468                | -0.2      | 22.63  | 89.0376, 149.0570, 177.0549                                                                        |
|                     |                        |                                                 | [M - H] <sup>-</sup>       | 291.16018                   | 291.16045                | 0.9       | 22.54  | -                                                                                                  |
| 46                  | 8-Shogaol              | C <sub>19</sub> H <sub>28</sub> O <sub>3</sub>  | [M + H] <sup>+</sup>       | 305.21112                   | 305.21137                | 0.8       | 28.15  | 91.0543, 137.0618, 177.0861                                                                        |
| 47                  | 6-Gingerdiol           | C <sub>17</sub> H <sub>28</sub> O <sub>4</sub>  | [M + H] <sup>+</sup>       | 297.20604                   | 297.20596                | -0.3      | 29.74  | 91.0554, 93.0673, 121.1000                                                                         |
|                     |                        |                                                 | [M - H] <sup>-</sup>       | 295.19148                   | 295.19175                | 0.9       | 29.73  | -                                                                                                  |
| 48                  | Dehydro-8-Gingerol     | C <sub>19</sub> H <sub>28</sub> O <sub>4</sub>  | [M + H] <sup>+</sup>       | 321.20604                   | 321.20576                | -0.9      | 30.22  | 137.0610, 103.0529                                                                                 |
| 49                  | Dehydro-6-Gingerdione  | C <sub>17</sub> H <sub>22</sub> O <sub>4</sub>  | [M + H] <sup>+</sup>       | 291.15909                   | 291.15917                | 0.3       | 30.36  | -                                                                                                  |
|                     |                        |                                                 | [M - H] <sup>-</sup>       | 289.14453                   | 289.14446                | -0.2      | 30.36  | -                                                                                                  |
| 50                  | 8-Gingerol             | C <sub>19</sub> H <sub>30</sub> O <sub>4</sub>  | [M + H] <sup>+</sup>       | 323.22169                   | 323.22137                | -1.0      | 30.71  | 93.0673, 121.1000, 187.1449, 207.0341                                                              |
|                     |                        |                                                 | [M - H] <sup>-</sup>       | 321.20713                   | 321.20742                | 0.9       | 30.71  | 80.9659, 101.0606                                                                                  |
| 51                  | 10-Shogaol             | C <sub>21</sub> H <sub>32</sub> O <sub>3</sub>  | [M + H] <sup>+</sup>       | 333.24242                   | 333.24211                | -0.9      | 30.91  | 93.0673, 95.0838, 121.1000                                                                         |
| 52                  | 8-Gingerdiol           | C <sub>19</sub> H <sub>32</sub> O <sub>4</sub>  | [M + H] <sup>+</sup>       | 325.23734                   | 325.23672                | -1.9      | 31.27  | 145.0667, 95.0853, 119.0868, 107.0851, 91.0533, 93.0685                                            |
|                     |                        |                                                 | [M - H] <sup>-</sup>       | 323.22278                   | 323.22331                | 1.6       | 31.28  | 101.0604, 239.1668                                                                                 |
| <b>Ginsenosides</b> |                        |                                                 |                            |                             |                          |           |        |                                                                                                    |
| 53                  | Notoginsenoside R6     | C <sub>48</sub> H <sub>82</sub> O <sub>19</sub> | [M - H] <sup>-</sup>       | 961.53775                   | 961.53878                | 1.1       | 13.56  | 799.4880, 179.0537, 781.4785, 89.0239, 637.4348, 119.0348, 323.0973, 619.4241, 101.0230, 161.0443  |
|                     |                        |                                                 | [M + Na] <sup>+</sup>      | 985.53425                   | 985.53282                | -1.5      | 13.54  | -                                                                                                  |
| 54                  | Floralginsenoside A    | C <sub>42</sub> H <sub>72</sub> O <sub>16</sub> | [M - H] <sup>-</sup>       | 831.47476                   | 831.47681                | 2.5       | 13.67  | 785.4719, 653.4309                                                                                 |
| 55                  | 20-Glucoginsenoside Rf | C <sub>48</sub> H <sub>82</sub> O <sub>19</sub> | [M - H] <sup>-</sup>       | 961.53775                   | 961.54023                | 2.6       | 13.97  | 799.4890, 637.4367, 89.0245, 781.4777, 475.3808, 619.4249, 161.0451, 179.0549, 101.0241, 119.0340  |
|                     |                        |                                                 | [M + Na] <sup>+</sup>      | 985.53425                   | 985.53330                | -1.0      | 13.94  | -                                                                                                  |
| 56                  | Notoginsenoside R9     | C <sub>36</sub> H <sub>62</sub> O <sub>10</sub> | [M + HCOOH-H] <sup>-</sup> | 699.43140                   | 699.43444                | 4.3       | 14.04  | 491.3771, 653.4142, 553.3523                                                                       |
| 57                  | Ginsenoside Ib         | C <sub>42</sub> H <sub>72</sub> O <sub>14</sub> | [M + Na] <sup>+</sup>      | 677.42352                   | 677.42103                | -3.7      | 14.02  | -                                                                                                  |
|                     |                        |                                                 | [M - H] <sup>-</sup>       | 799.48493                   | 799.48799                | 3.8       | 14.24  | -                                                                                                  |
| 58                  | Notoginsenoside R3     | C <sub>48</sub> H <sub>82</sub> O <sub>19</sub> | [M - H] <sup>-</sup>       | 961.53775                   | 961.54080                | 3.2       | 14.34  | 221.0668, 637.4357, 179.0560, 781.4793, 323.0976, 799.4862, 101.0245, 119.0358, 161.0488, 263.0779 |
|                     |                        |                                                 | [M + Na] <sup>+</sup>      | 985.53425                   | 985.53235                | -1.9      | 14.31  | -                                                                                                  |
| 59                  | Notoginsenoside R1     | C <sub>47</sub> H <sub>80</sub> O <sub>18</sub> | [M - H] <sup>-</sup>       | 931.52719                   | 931.53059                | 3.6       | 14.39  | 637.4375, 799.4942, 475.3838, 619.4303, 161.0435, 179.0549, 769.4796, 751.4667, 119.0347, 89.0242  |
|                     |                        |                                                 | [M + Na] <sup>+</sup>      | 955.52369                   | 955.52206                | -1.7      | 14.36  | 775.4593                                                                                           |



Table S1. Cont.

| No. | Compound              | Formula                                         | Ion Adduction              | Theoretical <i>m/z</i> (Da) | Measured <i>m/z</i> (Da) | Error/ppm | tr/min | Product Ions ( <i>m/z</i> , Da)                                                                             |
|-----|-----------------------|-------------------------------------------------|----------------------------|-----------------------------|--------------------------|-----------|--------|-------------------------------------------------------------------------------------------------------------|
| 60  | Notoginsenoside N     | C <sub>48</sub> H <sub>82</sub> O <sub>19</sub> | [M – H] <sup>–</sup>       | 961.53775                   | 961.54035                | 2.7       | 14.64  | 799.4898, 637.4332, 179.0555, 781.4790, 89.0248, 119.0359, 475.3807, 143.0354, 619.4229, 161.0483           |
|     |                       |                                                 | [M + Na] <sup>+</sup>      | 985.53425                   | 985.53328                | –1.0      | 14.60  | 805.4686                                                                                                    |
| 61  | Notoginsenoside M     | C <sub>48</sub> H <sub>82</sub> O <sub>19</sub> | [M – H] <sup>–</sup>       | 961.53775                   | 961.54135                | 3.7       | 14.87  | 799.4919, 637.4403, 161.0454, 323.0993, 101.0233, 143.0365, 203.0550                                        |
|     |                       |                                                 | [M + Na] <sup>+</sup>      | 985.53425                   | 985.53521                | 1.0       | 14.85  | 643.4192                                                                                                    |
| 62  | Ginsenoside Re        | C <sub>48</sub> H <sub>82</sub> O <sub>18</sub> | [M – H] <sup>–</sup>       | 945.54284                   | 945.54636                | 3.7       | 15.10  | 637.4351, 783.4943, 799.4893, 475.3795, 765.4842, 619.4253, 119.0341, 161.0451, 781.4805, 89.0239           |
|     |                       |                                                 | [M + Na] <sup>+</sup>      | 969.53934                   | 969.53839                | –1.0      | 15.06  | -                                                                                                           |
| 63  | Ginsenoside Rg1       | C <sub>42</sub> H <sub>72</sub> O <sub>14</sub> | [M – H] <sup>–</sup>       | 799.48493                   | 799.48812                | 4.0       | 15.17  | -                                                                                                           |
|     |                       |                                                 | [M + Na] <sup>+</sup>      | 823.48143                   | 823.48071                | –0.9      | 15.13  | 643.4171, 463.3548, 481.3610                                                                                |
| 64  | Vina-ginsenoside R1   | C <sub>44</sub> H <sub>74</sub> O <sub>15</sub> | [M – H] <sup>–</sup>       | 841.49550                   | 841.49746                | 2.3       | 15.34  | 781.4756, 637.4349, 619.4279, 475.3831, 799.4927, 89.0260, 113.0297, 119.0334, 161.0530, 221.0675           |
| 65  | Ginsenoside F3        | C <sub>41</sub> H <sub>70</sub> O <sub>13</sub> | [M + HCOOH-H] <sup>–</sup> | 815.47875                   | 815.48179                | 3.7       | 17.17  | 637.4353, 475.3791                                                                                          |
| 66  | Pseudoginsenoside F11 | C <sub>42</sub> H <sub>72</sub> O <sub>14</sub> | [M – H] <sup>–</sup>       | 799.48493                   | 799.48781                | 3.6       | 18.67  | 475.3815, 637.4374, 101.0243, 161.0455, 89.0248, 119.0346, 221.0671, 179.0564, 143.0351, 457.3711           |
|     |                       |                                                 | [M + Na] <sup>+</sup>      | 823.48143                   | 823.48134                | –0.1      | 18.70  | 661.4309                                                                                                    |
| 67  | Ginsenoside Rf        | C <sub>42</sub> H <sub>72</sub> O <sub>14</sub> | [M – H] <sup>–</sup>       | 799.48493                   | 799.48781                | 3.6       | 19.05  | -                                                                                                           |
|     |                       |                                                 | [M + Na] <sup>+</sup>      | 823.48143                   | 823.47991                | –1.8      | 19.09  | -                                                                                                           |
| 68  | Ginsenoside F5        | C <sub>41</sub> H <sub>70</sub> O <sub>13</sub> | [M – H] <sup>–</sup>       | 769.47437                   | 769.47703                | 3.5       | 19.33  | 475.3812, 637.4363, 101.0245, 161.0452, 391.2862, 113.0238, 89.0249, 119.0334, 131.0350, 457.3697           |
|     |                       |                                                 | [M + Na] <sup>+</sup>      | 793.47086                   | 793.46984                | –1.3      | 19.36  | 673.4285, 481.3649                                                                                          |
| 69  | Ginsenoside Ro        | C <sub>48</sub> H <sub>76</sub> O <sub>19</sub> | [M – H] <sup>–</sup>       | 955.49080                   | 955.49368                | 3.0       | 19.75  | -                                                                                                           |
|     |                       |                                                 | [M + Na] <sup>+</sup>      | 979.48730                   | 979.48644                | –0.9      | 19.81  | 641.4019, 623.3902, 817.4336, 185.0413, 393.35525, 439.3506                                                 |
| 70  | S-Ginsenoside Rg2     | C <sub>42</sub> H <sub>72</sub> O <sub>13</sub> | [M – H] <sup>–</sup>       | 783.49002                   | 783.49109                | 1.4       | 20.00  | 475.3804, 637.4360, 101.0240, 619.4231, 163.0611, 143.0354, 159.0298, 391.2842, 89.0243, 205.0720           |
|     |                       |                                                 | [M + Na] <sup>+</sup>      | 807.48651                   | 807.48711                | 0.7       | 20.05  | 661.4271, 481.3622                                                                                          |
| 71  | S-Ginsenoside Rh1     | C <sub>36</sub> H <sub>62</sub> O <sub>9</sub>  | [M + HCOOH-H] <sup>–</sup> | 683.43649                   | 683.43983                | 4.9       | 20.21  | 475.3791, 101.0246, 161.0449, 391.2868, 143.0349, 553.3407, 621.4033, 89.0261, 459.3686, 503.3307           |
|     |                       |                                                 | [M + Na] <sup>+</sup>      | 661.42861                   | 661.42846                | –0.2      | 20.27  | 481.3677                                                                                                    |
| 72  | Ginsenoside Rb1       | C <sub>54</sub> H <sub>92</sub> O <sub>23</sub> | [M – H] <sup>–</sup>       | 1107.59566                  | 1107.59921               | 3.2       | 20.29  | 945.5509, 783.4960, 179.0567, 621.4407, 221.0667, 323.0995, 765.4845, 119.0353, 89.0251, 101.0252, 161.0470 |
|     |                       |                                                 | [M + Na] <sup>+</sup>      | 1131.59216                  | 1131.59178               | –0.3      | 20.37  | 789.4797                                                                                                    |

Table S1. Cont.

| No. | Compound            | Formula                                         | Ion Adduction              | Theoretical <i>m/z</i> (Da) | Measured <i>m/z</i> (Da) | Error/ppm | tr/min | Product Ions ( <i>m/z</i> , Da)                                                                             |
|-----|---------------------|-------------------------------------------------|----------------------------|-----------------------------|--------------------------|-----------|--------|-------------------------------------------------------------------------------------------------------------|
| 73  | R-Ginsenoside Rg2   | C <sub>42</sub> H <sub>72</sub> O <sub>13</sub> | [M + Na] <sup>+</sup>      | 807.48651                   | 807.48589                | -0.8      | 20.44  | 661.426                                                                                                     |
| 74  | Ginsenoside Rs2     | C <sub>55</sub> H <sub>92</sub> O <sub>23</sub> | [M + HCOOH-H] <sup>-</sup> | 1165.60005                  | 1165.60518               | 4.4       | 20.59  | -                                                                                                           |
| 75  | R-Ginsenoside Rh1   | C <sub>36</sub> H <sub>62</sub> O <sub>9</sub>  | [M + HCOOH-H] <sup>-</sup> | 683.43649                   | 683.43981                | 4.9       | 20.71  | 475.3816, 161.0462, 101.0238, 391.2857, 553.3415, 89.0226, 621.4071                                         |
|     |                     |                                                 | [M + Na] <sup>+</sup>      | 661.42861                   | 661.42813                | -0.7      | 20.79  | 481.3632                                                                                                    |
| 76  | Ginsenoside Ra1/Ra2 | C <sub>58</sub> H <sub>98</sub> O <sub>26</sub> | [M - H] <sup>-</sup>       | 1209.62736                  | 1209.63248               | 4.2       | 20.80  | 1077.5893, 783.4958, 915.5268, 191.0551, 323.0995, 945.5484, 1047.5825, 131.0401, 293.0933, 621.4412        |
|     |                     |                                                 | [M + Na] <sup>+</sup>      | 1233.62386                  | 1233.62361               | -0.2      | 20.90  | 789.4769                                                                                                    |
| 77  | Ginsenoside Rc      | C <sub>53</sub> H <sub>90</sub> O <sub>22</sub> | [M - H] <sup>-</sup>       | 1077.58510                  | 1077.58888               | 3.5       | 20.86  | 945.5527, 783.4979, 915.5377, 765.4853, 621.4433, 149.0422, 191.0551, 221.0670, 293.0878, 89.0239, 251.0765 |
|     |                     |                                                 | [M + Na] <sup>+</sup>      | 1101.58160                  | 1101.58181               | 0.2       | 20.95  | 789.4774                                                                                                    |
| 78  | Ginsenoside Rb2     | C <sub>53</sub> H <sub>90</sub> O <sub>22</sub> | [M - H] <sup>-</sup>       | 1077.58510                  | 1077.58992               | 4.5       | 21.37  | 945.5527, 915.5414, 783.4978, 765.4860, 149.0459, 293.0886, 191.0562, 89.0242, 621.4446, 101.0252, 221.0667 |
|     |                     |                                                 | [M + Na] <sup>+</sup>      | 1101.58160                  | 1101.58129               | -0.3      | 21.48  | 789.4762                                                                                                    |
| 79  | Ginsenoside Rb3     | C <sub>53</sub> H <sub>90</sub> O <sub>22</sub> | [M + Na] <sup>+</sup>      | 1101.58160                  | 1101.58083               | -0.7      | 21.61  | 789.4760                                                                                                    |
| 80  | Ginsenoside F1      | C <sub>36</sub> H <sub>62</sub> O <sub>9</sub>  | [M + HCOOH-H] <sup>-</sup> | 683.43649                   | 683.43943                | 4.3       | 22.02  | 475.3791, 161.0408                                                                                          |
|     |                     |                                                 | [M + Na] <sup>+</sup>      | 661.42861                   | 661.42835                | -0.4      | 22.11  | 481.3655                                                                                                    |
| 81  | Ginsenoside Rd      | C <sub>48</sub> H <sub>82</sub> O <sub>18</sub> | [M - H] <sup>-</sup>       | 945.54284                   | 945.54551                | 2.8       | 22.71  | 783.4974, 621.4423, 765.4894, 161.0461, 101.0234, 459.3872, 89.0244, 119.0337, 179.0582                     |
|     |                     |                                                 | [M + Na] <sup>+</sup>      | 969.53934                   | 969.53884                | -0.5      | 22.81  | 789.4764                                                                                                    |
| 82  | Ginsenoside Rg6     | C <sub>42</sub> H <sub>70</sub> O <sub>12</sub> | [M - H] <sup>-</sup>       | 765.47945                   | 765.48240                | 3.8       | 25.41  | 619.4249, 101.0235, 161.0453, 103.0408, 205.0747, 457.3709                                                  |
|     |                     |                                                 | [M + Na] <sup>+</sup>      | 789.47595                   | 789.47763                | 2.1       | 25.50  | -                                                                                                           |
| 83  | Ginsenoside Rk1     | C <sub>42</sub> H <sub>70</sub> O <sub>12</sub> | [M - H] <sup>-</sup>       | 811.48383                   | 811.48784                | 4.9       | 25.94  | 159.0299, 103.0391, 161.0450, 601.4176, 119.0352, 143.0351, 89.0240, 145.0543                               |
|     |                     |                                                 | [M + Na] <sup>+</sup>      | 789.47595                   | 789.47486                | -1.4      | 26.01  | -                                                                                                           |
| 84  | Ginsenoside Rk3     | C <sub>36</sub> H <sub>60</sub> O <sub>8</sub>  | [M + Na] <sup>+</sup>      | 643.41804                   | 643.41801                | 0.0       | 26.24  | -                                                                                                           |
| 85  | Ginsenoside Rg3     | C <sub>42</sub> H <sub>72</sub> O <sub>13</sub> | [M - H] <sup>-</sup>       | 829.49440                   | 829.49792                | 4.2       | 28.30  | 621.4423, 459.3882, 161.0450, 101.0243, 113.0261, 89.0269, 119.0350, 179.0775, 221.0667                     |
|     |                     |                                                 | [M + Na] <sup>+</sup>      | 807.48651                   | 807.48626                | -0.3      | 28.33  | -                                                                                                           |
| 86  | Ginsenoside F2      | C <sub>42</sub> H <sub>72</sub> O <sub>13</sub> | [M - H] <sup>-</sup>       | 783.49002                   | 783.49161                | 2.0       | 28.69  | 621.4423, 459.3855, 101.0243, 161.0450, 89.0253, 143.0375, 179.0560, 537.3441, 603.4304                     |
|     |                     |                                                 | [M + Na] <sup>+</sup>      | 807.48651                   | 807.48619                | -0.4      | 28.74  | -                                                                                                           |

Table S1. Cont.

| No.               | Compound                               | Formula                                         | Ion Adduction              | Theoretical <i>m/z</i> (Da) | Measured <i>m/z</i> (Da) | Error/ppm | tr/min | Product Ions ( <i>m/z</i> , Da)                                                                    |
|-------------------|----------------------------------------|-------------------------------------------------|----------------------------|-----------------------------|--------------------------|-----------|--------|----------------------------------------------------------------------------------------------------|
| 87                | Ginsenoside Rs4                        | C <sub>44</sub> H <sub>72</sub> O <sub>13</sub> | [M + HCOOH-H] <sup>-</sup> | 853.49440                   | 853.49844                | 4.7       | 30.23  | -                                                                                                  |
| 88                | Ginsenoside Rs5                        | C <sub>44</sub> H <sub>72</sub> O <sub>13</sub> | [M - H] <sup>-</sup>       | 853.49440                   | 853.49836                | 4.6       | 30.38  | 765.4842, 603.4314, 747.4759, 161.0459, 101.0263, 645.4415, 203.0626                               |
| 89                | Ginsenoside Ic                         | C <sub>42</sub> H <sub>70</sub> O <sub>12</sub> | [M - H] <sup>-</sup>       | 811.48383                   | 811.48719                | 4.1       | 30.61  | 161.0474, 603.4313, 101.0238, 143.0346, 89.0260, 119.0348                                          |
|                   |                                        |                                                 | [M + Na] <sup>+</sup>      | 789.47595                   | 789.47602                | 0.1       | 30.60  | -                                                                                                  |
| 90                | Ginsenoside Rg5                        | C <sub>42</sub> H <sub>70</sub> O <sub>12</sub> | [M - H] <sup>-</sup>       | 765.47945                   | 765.48204                | 3.4       | 30.76  | 603.4317, 101.0247, 161.0456, 179.0574, 89.0274, 119.0332, 101.0366, 221.0700, 143.0355            |
|                   |                                        |                                                 | [M + Na] <sup>+</sup>      | 789.47595                   | 789.47549                | -0.6      | 30.75  | -                                                                                                  |
| <b>Flavonoids</b> |                                        |                                                 |                            |                             |                          |           |        |                                                                                                    |
| 91                | Kaempferol                             | C <sub>15</sub> H <sub>10</sub> O <sub>6</sub>  | [M + H] <sup>+</sup>       | 287.05501                   | 287.05476                | -0.9      | 5.50   | -                                                                                                  |
| 92                | Taxifolin 3-glucoside                  | C <sub>21</sub> H <sub>22</sub> O <sub>12</sub> | [M - H] <sup>-</sup>       | 465.10385                   | 465.10454                | 1.5       | 5.51   | 285.0415, 125.0241, 303.0524, 177.0211, 275.0569, 151.0039, 217.0513, 189.0556, 121.0310, 195.0290 |
| 93                | Spinosin 6'''-(E)-p-coumarate          | C <sub>37</sub> H <sub>38</sub> O <sub>17</sub> | [M - H] <sup>-</sup>       | 753.20362                   | 753.20103                | -3.4      | 7.31   | -                                                                                                  |
| 94                | Quercetin 3-O-rhamnoside               | C <sub>21</sub> H <sub>20</sub> O <sub>11</sub> | [M - H] <sup>-</sup>       | 447.09329                   | 447.09433                | 2.3       | 8.66   | 327.0515, 357.0620, 297.0415, 285.0413, 339.0521, 201.0189                                         |
| 95                | Trifolin                               | C <sub>21</sub> H <sub>20</sub> O <sub>11</sub> | [M - H] <sup>-</sup>       | 447.09329                   | 447.09433                | 2.3       | 8.66   | 327.0515, 357.0620, 297.04115, 339.0521, 193.0156                                                  |
| 96                | Hyperoside                             | C <sub>21</sub> H <sub>20</sub> O <sub>12</sub> | [M + H] <sup>+</sup>       | 465.10275                   | 465.10232                | -0.9      | 9.55   | 303.0498, 285.0391, 153.0188, 85.0284, 91.0393, 109.0278, 137.0230, 111.0074, 163.0395, 121.0293   |
| 97                | Rutin                                  | C <sub>27</sub> H <sub>30</sub> O <sub>16</sub> | [M + H] <sup>+</sup>       | 611.16066                   | 611.16033                | -0.5      | 9.82   | 303.0506, 465.1017                                                                                 |
|                   |                                        |                                                 | [M - H] <sup>-</sup>       | 609.14611                   | 609.14867                | 4.2       | 9.78   | 301.0354, 151.0028, 343.0459, 285.0388, 175.0027, 107.0119, 121.0294                               |
| 98                | Afzelin                                | C <sub>21</sub> H <sub>20</sub> O <sub>10</sub> | [M + H] <sup>+</sup>       | 433.11292                   | 433.11286                | -0.1      | 9.87   | 283.0607, 313.0690, 309.0765, 323.0908, 121.0274                                                   |
|                   |                                        |                                                 | [M - H] <sup>-</sup>       | 431.09837                   | 431.09853                | 0.4       | 9.83   | 311.0569, 341.0662, 269.0442, 281.0446, 253.0516, 237.0576, 353.0689                               |
| 99                | Flavaprenin 7,4'-diglucoside           | C <sub>32</sub> H <sub>40</sub> O <sub>15</sub> | [M - H] <sup>-</sup>       | 663.22944                   | 663.23237                | 4.4       | 10.01  | 619.2438, 299.1656, 635.2390, 457.1887, 559.2215, 369.1711, 161.0610, 531.2252, 119.0349, 89.0247  |
| 100               | Kaempferol 3-O-rutinose                | C <sub>27</sub> H <sub>30</sub> O <sub>15</sub> | [M - H] <sup>-</sup>       | 593.15119                   | 593.15349                | 3.9       | 10.12  | 175.0401, 199.0400, 151.0037, 257.0462, 133.0316, 215.0350, 241.0493, 243.0310, 269.0453, 149.0254 |
| 101               | Isorhamnetin-3-O-neohesperidoside      | C <sub>28</sub> H <sub>32</sub> O <sub>16</sub> | [M + H] <sup>+</sup>       | 625.17631                   | 625.17546                | -1.4      | 11.23  | 317.0650, 285.0386, 129.0539, 479.1180, 97.0283, 147.0651, 153.0181, 127.0381, 329.0656, 301.1006  |
| 102               | Isorhamnetin-3-O-β-D-galactopyranoside | C <sub>22</sub> H <sub>22</sub> O <sub>12</sub> | [M + H] <sup>+</sup>       | 479.11840                   | 479.11791                | -1.0      | 11.24  | 317.0660, 285.0394, 153.0181, 97.0289, 145.0486, 127.0397, 139.0393, 151.0392, 271.0610, 91.0394   |
| 103               | Monoxerutin                            | C <sub>29</sub> H <sub>34</sub> O <sub>17</sub> | [M + H] <sup>+</sup>       | 655.18688                   | 655.18559                | -2.0      | 11.39  | 347.0751, 85.0284, 301.0324, 315.0505, 129.0547, 509.1243, 145.0513, 287.0546, 331.0398, 147.0656  |
| 104               | Spinosin                               | C <sub>28</sub> H <sub>32</sub> O <sub>15</sub> | [M + H] <sup>+</sup>       | 609.18140                   | 609.18082                | -0.9      | 12.13  | 301.0714, 463.1239                                                                                 |
| 105               | Quercetin                              | C <sub>15</sub> H <sub>10</sub> O <sub>7</sub>  | [M + H] <sup>+</sup>       | 303.04993                   | 303.04929                | -2.1      | 13.64  | -                                                                                                  |
|                   |                                        |                                                 | [M - H] <sup>-</sup>       | 301.03538                   | 301.03546                | 0.3       | 13.64  | 151.0041, 121.0295, 83.0178, 93.0347, 107.0138                                                     |

Table S1. Cont.

| No.                  | Compound                | Formula                                                       | Ion Adduction        | Theoretical <i>m/z</i> (Da) | Measured <i>m/z</i> (Da) | Error/ppm | tr/min | Product Ions ( <i>m/z</i> , Da)                                               |
|----------------------|-------------------------|---------------------------------------------------------------|----------------------|-----------------------------|--------------------------|-----------|--------|-------------------------------------------------------------------------------|
| <b>Organic acids</b> |                         |                                                               |                      |                             |                          |           |        |                                                                               |
| 106                  | Glutamyl-glutamic acid  | C <sub>10</sub> H <sub>16</sub> N <sub>2</sub> O <sub>7</sub> | [M + H] <sup>+</sup> | 277.10303                   | 277.10270                | -1.2      | 1.17   | -                                                                             |
|                      |                         |                                                               | [M - H] <sup>-</sup> | 275.08847                   | 275.08819                | -1.0      | 1.18   | -                                                                             |
| 107                  | Citric acid             | C <sub>6</sub> H <sub>8</sub> O <sub>7</sub>                  | [M + H] <sup>+</sup> | 193.03428                   | 193.03443                | 0.8       | 1.25   | -                                                                             |
|                      |                         |                                                               | [M - H] <sup>-</sup> | 191.01973                   | 191.02021                | 2.5       | 1.25   | 87.0098, 111.0096, 85.0304                                                    |
| 108                  | Pyroglutamic acid       | C <sub>5</sub> H <sub>7</sub> NO <sub>3</sub>                 | [M + H] <sup>+</sup> | 130.04987                   | 130.05004                | 1.3       | 1.28   | 84.0442                                                                       |
|                      |                         |                                                               | [M - H] <sup>-</sup> | 128.03532                   | 128.03589                | 4.5       | 1.27   | 82.0292                                                                       |
| 109                  | Nicotinic acid          | C <sub>6</sub> H <sub>5</sub> NO <sub>2</sub>                 | [M + H] <sup>+</sup> | 124.03930                   | 124.03917                | -1.1      | 1.55   | 80.0498, 81.0565                                                              |
|                      |                         |                                                               | [M - H] <sup>-</sup> | 122.02475                   | 122.02478                | 0.3       | 1.51   | 91.0178, 95.0146, 119.0132                                                    |
| 110                  | o/p-Coumaric acid       | C <sub>9</sub> H <sub>8</sub> O <sub>3</sub>                  | [M + H] <sup>+</sup> | 165.05462                   | 165.05466                | 0.2       | 1.57   | 95.0493, 119.0495                                                             |
|                      |                         |                                                               | [M - H] <sup>-</sup> | 163.04007                   | 163.04041                | 2.1       | 1.52   | -                                                                             |
| 111                  | Succinic acid           | C <sub>4</sub> H <sub>6</sub> O <sub>4</sub>                  | [M - H] <sup>-</sup> | 117.01933                   | 117.01969                | 3.1       | 1.61   | -                                                                             |
| 112                  | Vanillic acid           | C <sub>8</sub> H <sub>8</sub> O <sub>4</sub>                  | [M + H] <sup>+</sup> | 169.04954                   | 169.04944                | -0.6      | 3.04   | -                                                                             |
|                      |                         |                                                               | [M - H] <sup>-</sup> | 167.03498                   | 167.03537                | 2.3       | 3.05   | 109.0299, 121.0299, 123.0471, 91.0181, 149.0274                               |
| 113                  | Indole-3-acetic acid    | C <sub>10</sub> H <sub>9</sub> NO <sub>2</sub>                | [M + H] <sup>+</sup> | 176.07061                   | 176.07073                | 0.7       | 3.62   | 130.0649, 103.0541, 1147.0673, 104.0496, 102.0468, 118.0651, 105.0573         |
|                      |                         |                                                               | [M - H] <sup>-</sup> | 174.05605                   | 174.05686                | 4.6       | 3.62   | 174.0562, 145.0531, 156.0454, 92.0497, 114.0353                               |
| 114                  | Salicylic acid          | C <sub>7</sub> H <sub>6</sub> O <sub>3</sub>                  | [M - H] <sup>-</sup> | 137.02442                   | 137.02492                | 3.6       | 4.36   | 91.0178, 109.0283, 119.0132                                                   |
| 115                  | Chlorogenic acid        | C <sub>16</sub> H <sub>18</sub> O <sub>9</sub>                | [M + H] <sup>+</sup> | 355.10236                   | 355.10234                | -0.1      | 5.06   | 163.0392, 145.0285, 135.0440, 117.03355, 89.0384                              |
|                      |                         |                                                               | [M - H] <sup>-</sup> | 353.08781                   | 353.08835                | 1.5       | 5.06   | 191.0569, 85.0305                                                             |
| 116                  | 3-O-Feruloylquinic acid | C <sub>17</sub> H <sub>20</sub> O <sub>9</sub>                | [M + H] <sup>+</sup> | 369.11801                   | 369.11818                | 0.5       | 7.45   | 177.0547, 145.0285, 117.0337, 89.0386, 149.0597                               |
|                      |                         |                                                               | [M - H] <sup>-</sup> | 367.10346                   | 367.10398                | 1.4       | 7.43   | 191.0570, 173.0462, 93.0355, 193.0513, 111.0456                               |
| 117                  | Ferulic acid            | C <sub>10</sub> H <sub>10</sub> O <sub>4</sub>                | [M + H] <sup>+</sup> | 195.06519                   | 195.06531                | 0.6       | 8.72   | 89.0378, 117.0323, 105.0325, 145.0251, 163.0383, 103.0513, 123.0421, 135.0441 |
|                      |                         |                                                               | [M - H] <sup>-</sup> | 193.05063                   | 193.05111                | 2.5       | 8.69   | 133.0288                                                                      |
| 118                  | Folic acid              | C <sub>19</sub> H <sub>19</sub> N <sub>7</sub> O <sub>6</sub> | [M + H] <sup>+</sup> | 442.14696                   | 442.14635                | -1.4      | 9.27   | 280.0943, 83.0485                                                             |
| 119                  | Cinnamic acid           | C <sub>9</sub> H <sub>8</sub> O <sub>2</sub>                  | [M - H] <sup>-</sup> | 147.04515                   | 147.04541                | 1.7       | 13.60  | -                                                                             |
| 120                  | Goshuyic acid/ isomer   | C <sub>14</sub> H <sub>24</sub> O <sub>2</sub>                | [M - H] <sup>-</sup> | 223.17035                   | 223.17065                | 1.3       | 30.83  | -                                                                             |
| 121                  | Oleanolic acid          | C <sub>30</sub> H <sub>48</sub> O <sub>3</sub>                | [M - H] <sup>-</sup> | 455.35307                   | 455.35238                | -1.5      | 32.33  | -                                                                             |
| <b>Alkaloids</b>     |                         |                                                               |                      |                             |                          |           |        |                                                                               |
| 122                  | Synephrine              | C <sub>9</sub> H <sub>13</sub> NO <sub>2</sub>                | [M + H] <sup>+</sup> | 168.10191                   | 168.10221                | 1.8       | 1.52   | 107.0491, 134.0602                                                            |
| 123                  | Echinopsine             | C <sub>10</sub> H <sub>9</sub> NO                             | [M + H] <sup>+</sup> | 160.07569                   | 160.07562                | -0.5      | 2.67   | 132.0813, 131.0706, 104.0472, 105.0321                                        |
| 124                  | Kokusaginine            | C <sub>14</sub> H <sub>13</sub> NO <sub>4</sub>               | [M + H] <sup>+</sup> | 260.09173                   | 260.09208                | 1.3       | 5.27   | -                                                                             |

Table S1. Cont.

| No.                          | Compound            | Formula                                                       | Ion Adduction              | Theoretical <i>m/z</i> (Da) | Measured <i>m/z</i> (Da) | Error/ppm | tr/min | Product Ions ( <i>m/z</i> , Da)                                                                              |
|------------------------------|---------------------|---------------------------------------------------------------|----------------------------|-----------------------------|--------------------------|-----------|--------|--------------------------------------------------------------------------------------------------------------|
| 125                          | Aposcopolamine      | C <sub>17</sub> H <sub>19</sub> NO <sub>3</sub>               | [M + H] <sup>+</sup>       | 286.14377                   | 286.14401                | 0.8       | 7.22   | 194.0723, 189.0695, 175.0746, 166.0774, 131.0484, 103.0538, 208.0874, 163.0742, 122.0362, 236.0823           |
| 126                          | Norharman           | C <sub>11</sub> H <sub>8</sub> N <sub>2</sub>                 | [M + H] <sup>+</sup>       | 169.07602                   | 169.07615                | 0.7       | 7.41   | 169.0766, 141.0577, 116.0490, 142.0659, 90.0460                                                              |
| 127                          | Stepharine          | C <sub>18</sub> H <sub>19</sub> NO <sub>3</sub>               | [M + H] <sup>+</sup>       | 298.14377                   | 298.14401                | 0.8       | 7.67   | 192.1024, 238.0987, 210.1028, 254.0923, 250.0988, 269.1156, 253.1208, 266.0931, 234.0662, 281.1124           |
| 128                          | Sinomenine          | C <sub>19</sub> H <sub>23</sub> NO <sub>4</sub>               | [M + H] <sup>+</sup>       | 330.16998                   | 330.16980                | -0.6      | 8.57   | 137.0596, 299.1271, 194.0723, 284.1022, 208.0891, 287.1268, 272.1025, 121.0644, 298.1434, 268.1091           |
| 129                          | Asimilobine         | C <sub>17</sub> H <sub>17</sub> NO <sub>2</sub>               | [M + H] <sup>+</sup>       | 268.13321                   | 268.13352                | 1.2       | 9.85   | 192.0923, 178.0779, 236.0841, 251.1065, 220.0915                                                             |
| 130                          | Isoplatydesmine     | C <sub>15</sub> H <sub>17</sub> NO <sub>3</sub>               | [M + H] <sup>+</sup>       | 260.12812                   | 260.12849                | 1.4       | 10.18  | 184.0757, 200.1074, 242.1182, 158.0611, 172.0766, 132.0571, 104.0479, 103.0541, 127.0547, 157.0875, 176.0711 |
| 131                          | N-Methylasimilobine | C <sub>18</sub> H <sub>19</sub> NO <sub>2</sub>               | [M + H] <sup>+</sup>       | 282.14886                   | 282.14886                | 0.0       | 13.48  | 234.1039, 250.0795, 192.0979, 236.0839, 206.0734, 282.1494                                                   |
| 132                          | Skimmianine         | C <sub>14</sub> H <sub>13</sub> NO <sub>4</sub>               | [M + H] <sup>+</sup>       | 260.09173                   | 260.09178                | 0.2       | 17.67  | 230.0458, 216.0656, 174.0566, 212.0349, 244.0631, 198.0535, 228.0306, 260.0914, 146.0651                     |
| 133                          | Sanjoinine F        | C <sub>31</sub> H <sub>42</sub> N <sub>4</sub> O <sub>5</sub> | [M + HCOOH-H] <sup>-</sup> | 595.31263                   | 595.31244                | -0.3      | 20.04  | -                                                                                                            |
| 134                          | Cocculolidine       | C <sub>15</sub> H <sub>17</sub> NO <sub>3</sub>               | [M + H] <sup>+</sup>       | 260.12812                   | 260.12852                | 1.6       | 20.67  | 83.0128, 162.0554, 176.0710, 188.0336, 204.0659, 260.1292                                                    |
| 135                          | Atanine             | C <sub>15</sub> H <sub>17</sub> NO <sub>2</sub>               | [M + H] <sup>+</sup>       | 244.13321                   | 244.13359                | 1.6       | 22.62  | 188.0708, 158.0599, 144.0472, 172.0399                                                                       |
| <b>Saponins</b>              |                     |                                                               |                            |                             |                          |           |        |                                                                                                              |
| 136                          | Sanchinoside B1     | C <sub>36</sub> H <sub>62</sub> O <sub>9</sub>                | [M + H] <sup>+</sup>       | 639.44666                   | 639.44620                | -0.7      | 10.80  | 405.3014, 109.1011, 127.1119, 621.4437, 107.0845, 603.4266                                                   |
| 137                          | Yesanchinoside D    | C <sub>44</sub> H <sub>74</sub> O <sub>15</sub>               | [M + HCOOH-H] <sup>-</sup> | 887.49988                   | 887.50395                | 4.6       | 15.34  | 781.4798, 637.4346, 619.4241, 799.4910, 101.0230, 161.0454, 113.0239, 475.3817, 119.0353, 783.4859, 801.4947 |
| 138                          | Yesanchinoside F    | C <sub>56</sub> H <sub>94</sub> O <sub>24</sub>               | [M - H] <sup>-</sup>       | 1149.60623                  | 1149.61086               | 4.0       | 20.06  | 1107.6017, 1089.5908, 945.5491, 783.4942, 621.4404                                                           |
| 139                          | Araloside A         | C <sub>47</sub> H <sub>74</sub> O <sub>18</sub>               | [M - H] <sup>-</sup>       | 925.48024                   | 925.48309                | 3.1       | 20.55  | -                                                                                                            |
| 140                          | Ciwujianoside D1    | C <sub>55</sub> H <sub>88</sub> O <sub>22</sub>               | [M + H] <sup>+</sup>       | 1101.58400                  | 1101.58154               | -2.2      | 21.48  | 789.4762, 335.0947, 365.1035, 203.0540, 921.5035                                                             |
| <b>2,2-Dimethylchromenes</b> |                     |                                                               |                            |                             |                          |           |        |                                                                                                              |
| 141                          | Leptol B            | C <sub>15</sub> H <sub>20</sub> O <sub>4</sub>                | [M + H] <sup>+</sup>       | 265.14344                   | 265.14390                | 1.8       | 6.00   | 83.0461, 165.0690, 181.0657, 189.1289, 195.0799, 199.0764, 203.1043                                          |
| 142                          | Isoevodionol        | C <sub>14</sub> H <sub>16</sub> O <sub>4</sub>                | [M - H] <sup>-</sup>       | 247.09758                   | 247.09782                | 0.9       | 8.88   | 173.0586, 135.0436, 187.077552, 107.0483, 133.0635, 151.0768, 135.0535, 189.0499                             |
| 143                          | Leptonol            | C <sub>15</sub> H <sub>18</sub> O <sub>5</sub>                | [M - H] <sup>-</sup>       | 277.10815                   | 277.10843                | 1.0       | 16.36  | 231.1026, 97.0292, 205.1212                                                                                  |
| <b>Others</b>                |                     |                                                               |                            |                             |                          |           |        |                                                                                                              |
| 144                          | Mannose             | C <sub>6</sub> H <sub>12</sub> O <sub>6</sub>                 | [M - H] <sup>-</sup>       | 179.05611                   | 179.05634                | 1.3       | 1.17   | 89.0238, 101.0232, 89.0323, 131.0350                                                                         |
| 145                          | Xylose              | C <sub>5</sub> H <sub>10</sub> O <sub>5</sub>                 | [M - H] <sup>-</sup>       | 149.04555                   | 149.04578                | 1.6       | 1.21   | -                                                                                                            |
| 146                          | Sucrose             | C <sub>12</sub> H <sub>22</sub> O <sub>11</sub>               | [M + HCOOH-H] <sup>-</sup> | 387.11332                   | 387.11428                | 2.5       | 1.21   | 89.0254, 119.0355, 101.0252, 179.0567, 161.0459, 143.0354, 131.0353, 149.0457, 221.0673, 281.0871            |

Table S1. Cont.

| No. | Compound                 | Formula                                                      | Ion Adduction              | Theoretical <i>m/z</i> (Da) | Measured <i>m/z</i> (Da) | Error/ppm | tr/min | Product Ions ( <i>m/z</i> , Da)                                                                              |
|-----|--------------------------|--------------------------------------------------------------|----------------------------|-----------------------------|--------------------------|-----------|--------|--------------------------------------------------------------------------------------------------------------|
| 147 | Dianthoside              | C <sub>12</sub> H <sub>16</sub> O <sub>8</sub>               | [M + H] <sup>+</sup>       | 289.09179                   | 289.09178                | -0.1      | 1.22   | -                                                                                                            |
| 148 | Manninotriose            | C <sub>18</sub> H <sub>32</sub> O <sub>16</sub>              | [M + H] <sup>+</sup>       | 505.17631                   | 505.17591                | -0.8      | 1.23   | -                                                                                                            |
| 149 | Caffeine                 | C <sub>8</sub> H <sub>10</sub> N <sub>4</sub> O <sub>2</sub> | [M + HCOOH-H] <sup>-</sup> | 239.07748                   | 239.07732                | -0.7      | 1.33   | -                                                                                                            |
| 150 | Safrole                  | C <sub>10</sub> H <sub>10</sub> O <sub>2</sub>               | [M + H] <sup>+</sup>       | 163.07536                   | 163.07532                | -0.2      | 1.73   | 117.0698, 145.0670                                                                                           |
| 151 | Prodelphinidin B/ isomer | C <sub>30</sub> H <sub>26</sub> O <sub>14</sub>              | [M - H] <sup>-</sup>       | 609.12498                   | 609.12592                | 1.5       | 2.55   | -                                                                                                            |
| 152 | 4-Hydroxycoumarin        | C <sub>9</sub> H <sub>6</sub> O <sub>3</sub>                 | [M + H] <sup>+</sup>       | 163.03897                   | 163.03903                | 0.4       | 5.10   | -                                                                                                            |
| 153 | Catechin                 | C <sub>15</sub> H <sub>14</sub> O <sub>6</sub>               | [M + H] <sup>+</sup>       | 291.08631                   | 291.08633                | 0.1       | 5.21   | 123.0444, 139.0396, 93.0335, 111.0447, 83.0497, 121.0288, 165.0549, 207.0653                                 |
|     |                          |                                                              | [M - H] <sup>-</sup>       | 289.07176                   | 289.07192                | 0.5       | 5.21   | 123.0459, 109.0304, 151.0404, 137.0252, 97.0310, 125.0249, 187.0409, 205.0505, 149.0244, 135.0463            |
| 154 | Normelicopidine          | C <sub>16</sub> H <sub>13</sub> NO <sub>5</sub>              | [M + H] <sup>+</sup>       | 300.08665                   | 300.08672                | 0.2       | 5.58   | 103.0523, 106.0292, 107.0505, 222.0598, 226.0866, 254.0808, 256.0592, 284.0544, 300.0858                     |
| 155 | Zizyboside I             | C <sub>19</sub> H <sub>28</sub> O <sub>11</sub>              | [M - H] <sup>-</sup>       | 431.15589                   | 431.15618                | 0.7       | 6.64   | 101.1233, 161.0441, 89.0237                                                                                  |
| 156 | Lyoniresinol             | C <sub>22</sub> H <sub>28</sub> O <sub>8</sub>               | [M + H] <sup>+</sup>       | 421.18569                   | 421.18589                | 0.5       | 6.82   | -                                                                                                            |
|     |                          |                                                              | [M - H] <sup>-</sup>       | 419.17114                   | 419.17114                | 0.0       | 6.82   | 357.1705, 199.1100, 263.1291, 237.1280, 255.1414, 135.0441, 317.1385                                         |
| 157 | Blumenol A               | C <sub>13</sub> H <sub>20</sub> O <sub>3</sub>               | [M + H] <sup>+</sup>       | 225.14852                   | 225.14838                | -0.6      | 8.00   | 81.0687, 85.0279                                                                                             |
| 158 | Corchoionoside B         | C <sub>19</sub> H <sub>28</sub> O <sub>9</sub>               | [M - H] <sup>-</sup>       | 399.16606                   | 399.16581                | -0.6      | 9.17   | 219.1009                                                                                                     |
| 159 | Geranyl acetate          | C <sub>12</sub> H <sub>20</sub> O <sub>2</sub>               | [M - H] <sup>-</sup>       | 195.13905                   | 195.13902                | -0.2      | 9.67   | -                                                                                                            |
| 160 | Evodone                  | C <sub>10</sub> H <sub>12</sub> O <sub>2</sub>               | [M + H] <sup>+</sup>       | 165.09101                   | 165.09109                | 0.5       | 12.63  | 81.0332, 109.0924                                                                                            |
| 161 | Physalin B               | C <sub>28</sub> H <sub>30</sub> O <sub>9</sub>               | [M + H] <sup>+</sup>       | 511.19626                   | 511.19500                | -2.5      | 13.21  | -                                                                                                            |
| 162 | Icariside B1             | C <sub>19</sub> H <sub>30</sub> O <sub>8</sub>               | [M + HCOOH-H] <sup>-</sup> | 431.19117                   | 431.19320                | 4.7       | 13.33  | 265.0937, 103.0405, 137.0616, 247.0832, 207.1039, 181.1243, 165.0916, 145.0513, 89.0256, 119.0350, 125.0606  |
| 163 | Zizyvoside I             | C <sub>25</sub> H <sub>40</sub> O <sub>12</sub>              | [M - H] <sup>-</sup>       | 531.24470                   | 531.24452                | -0.3      | 15.68  | -                                                                                                            |
| 164 | α-Curcumene              | C <sub>15</sub> H <sub>22</sub>                              | [M + H] <sup>+</sup>       | 203.17943                   | 203.17953                | 0.5       | 15.13  | 91.0540, 119.0851, 105.0692, 117.0697, 133.1014, 145.1013,                                                   |
| 165 | Panaxene                 | C <sub>15</sub> H <sub>24</sub>                              | [M + H] <sup>+</sup>       | 205.19508                   | 205.19522                | 0.7       | 19.82  | -                                                                                                            |
| 166 | Taraxerone               | C <sub>30</sub> H <sub>48</sub> O                            | [M + H] <sup>+</sup>       | 425.37779                   | 425.37741                | -0.9      | 20.37  | 123.1165, 189.1634, 203.1788, 217.1936, 207.1736, 191.1792, 271.2420, 137.1335, 285.2578, 151.1465, 205.1954 |
| 167 | Panaxydol                | C <sub>17</sub> H <sub>24</sub> O <sub>2</sub>               | [M + H] <sup>+</sup>       | 261.18491                   | 261.18511                | 0.8       | 21.02  | 91.0546, 103.0547, 117.0701, 131.0489, 137.0601, 145.0656, 147.0471, 151.0778, 161.0615, 173.0958, 175.0801  |
| 168 | Copaene/isomer           | C <sub>15</sub> H <sub>24</sub>                              | [M + H] <sup>+</sup>       | 205.19508                   | 205.19528                | 1.0       | 21.23  | -                                                                                                            |
